# Supplementary material
Source: PubMed Central journal article supplement (PMC2965350)
Supplement: mmc1.pdf [file mmc1.pdf]

# THE LANCET

## **Supplementary webappendix**

This webappendix formed part of the original submission and has been peer reviewed. We post it as supplied by the authors.

Supplement to: Williams NM, Zaharieva I, Martin A, et al. Rare chromosomal deletions and duplications in attention-deficit hyperactivity disorder: a genome-wide analysis. *Lancet* 2010; published online September 30. DOI:10.1016/S0140-6736(10)61109-9.

## **WebAppendix**

### **A genome-wide analysis of rare chromosomal deletions and duplications in attention-deficit hyperactivity disorder**

Nigel M. Williams<sup>1,2\*</sup>, Irina Zaharieva<sup>1,2</sup>, Andrew Martin<sup>1,2</sup>, Kate Langley<sup>1,2</sup>, Kiran Mantripragada<sup>1,2</sup>, Ragnheidur Fossdal<sup>3</sup>, Hreinn Stefansson<sup>3</sup>, Kari Stefansson<sup>3</sup>, Pall Magnusson<sup>4</sup>, Olafur O. Gudmundsson<sup>4</sup>, Omar Gustafsson<sup>3,5</sup>, Peter Holmans<sup>1,2</sup>, Michael J. Owen<sup>1,2</sup>, Michael O'Donovan<sup>1,2</sup>, Anita Thapar<sup>1,2\*</sup>

1 MRC Centre in Neuropsychiatric Genetics and Genomics, Cardiff University School of Medicine

2 Department of Psychological Medicine and Neurology, Cardiff University School of Medicine

3 deCODE genetics, Sturlugata 8, 101 Reykjavik ,Iceland

4 Child and Adolescent Psychiatry, Landspítali University Hospital, Dalbraut 12 , IS-105, Iceland

5 Department of Psychiatry, Oslo University Hospital, Kirkevejen 166, 0407 Oslo, Norway.



## Supplementary Table 2

Chromosome and start and end point of all 118 CNVs >500kb spanning or intersecting a known gene in HG18, together with the ID of genes disrupted. The 19 CNVs that do not span a gene are not presented

| <b>CNV coordinates</b>   | <b>Genes</b>                                                                                                                                                                                                                                        |
|--------------------------|-----------------------------------------------------------------------------------------------------------------------------------------------------------------------------------------------------------------------------------------------------|
| chr1:742429-1303878      | SAMD11<br>NOC2L<br>KLHL17<br>PLEKHN1<br>HES4<br>ISG15<br>AGRN<br>C1orf159<br>TTLL10<br>TNFRSF18<br>TNFRSF4<br>SDF4<br>B3GALT6<br>FAM132A<br>UBE2J2<br>SCNN1D<br>CENTB5<br>PUSL1<br>CPSF3L<br>GLTPD1<br>TAS1R3<br>DVL1<br>MXRA8<br>AURKAIP1<br>CCNL2 |
| chr1:144943150-146293282 | PRKAB2<br>FMO5<br>CHD1L<br>BCL9<br>ACP6<br>GJA5<br>GJA8<br>GPR89B<br>GPR89C<br>NBPF11<br>LOC728912                                                                                                                                                  |
| chr1:159732044-160374743 | FCGR2A<br>HSPA6<br>FCGR3A<br>FCGR2C<br>FCGR3B<br>FCGR2B<br>FCRLA<br>FCRLB                                                                                                                                                                           |

DUSP12  
ATF6  
OLFML2B  
NOS1AP

chr1:235967993-237654135 RYR2  
ZP4

chr1:245714416-246522135 OR2W5  
OR2C3  
C1orf150  
OR2G2  
OR2G3  
OR13G1  
OR6F1  
OR1C1  
OR14A16  
OR11L1  
TRIM58  
OR2W3  
OR2T8  
OR2L13  
OR2L8  
OR2AK2  
OR2L2  
OR2L3  
OR2M5  
OR2M2  
OR2M3  
OR2M4  
OR2T33  
OR2T12

chr2:32487194-33232767 BIRC6  
TTC27  
LTBP1

chr2:32497032-33142223 BIRC6  
TTC27  
LTBP1

chr2:32497032-33181898 BIRC6  
TTC27  
LTBP1

chr2:45264692-45857588 SRBD1  
PRKCE

|                          |                                                                      |
|--------------------------|----------------------------------------------------------------------|
| chr2:100194339-100878975 | LONRF2<br>CHST10<br>NMS<br>LOC643896<br>PDCL3<br>NPAS2               |
| chr2:117555176-118507870 | DDX18<br>CCDC93                                                      |
| chr2:153846483-154565034 | RPRM<br>GALNT13                                                      |
| chr2:158090314-158967549 | ACVR1C<br>ACVR1<br>UPP2<br>CCDC148                                   |
| chr2:205197898-205833558 | PARD3B                                                               |
| chr3:209726-1685731      | CHL1<br>CNTN6                                                        |
| chr3:840779-1402079      | CNTN6                                                                |
| chr3:849785-1352410      | CNTN6                                                                |
| chr3:1166638-2183832     | CNTN6<br>CNTN4                                                       |
| chr3:2969491-4557680     | CNTN4<br>IL5RA<br>TRNT1<br>CRBN<br>LRRN1<br>SETMAR<br>SUMF1<br>ITPR1 |
| chr3:3423534-4063576     | LRRN1                                                                |
| chr3:3999657-4922174     | SETMAR<br>SUMF1<br>ITPR1                                             |

|                          |                                                                                                                                       |
|--------------------------|---------------------------------------------------------------------------------------------------------------------------------------|
| chr3:58472819-60222161   | KCTD6<br>ACOX2<br>FAM107A<br>FAM3D<br>C3orf67<br>FHIT                                                                                 |
| chr3:75816778-77177489   | ZNF717<br>ROBO2                                                                                                                       |
| chr3:96242194-98526743   | EPHA6                                                                                                                                 |
| chr3:155817656-156432544 | MME                                                                                                                                   |
| chr3:162419058-163993833 | NMD3<br>C3orf57<br>OTOL1                                                                                                              |
| chr3:174547344-176016137 | NLGN1                                                                                                                                 |
| chr3:194235339-194817685 | HRASLS<br>ATP13A5<br>ATP13A4<br>OPA1                                                                                                  |
| chr3:194759366-195501036 | ATP13A4<br>OPA1<br>HES1                                                                                                               |
| chr4:23596065-26908642   | DHX15<br>SOD3<br>CCDC149<br>LGI2<br>SEPSECS<br>PI4K2B<br>ZCCHC4<br>ANAPC4<br>SLC34A2<br>KIAA0746<br>RBPJ<br>CCKAR<br>TBC1D19<br>STIM2 |

|                        |                                                                                                                                                                                     |
|------------------------|-------------------------------------------------------------------------------------------------------------------------------------------------------------------------------------|
| chr4:26350218-27533657 | TBC1D19<br>STIM2                                                                                                                                                                    |
| chr4:64314017-65184017 | SRD5A2L2                                                                                                                                                                            |
| chr4:65791505-66506505 | EPHA5                                                                                                                                                                               |
| chr4:65846170-66521854 | EPHA5                                                                                                                                                                               |
| chr4:70889530-72068561 | STATH<br>HTN3<br>HTN1<br>C4orf40<br>ODAM<br>C4orf7<br>CSN3<br>C4orf35<br>SMR3A<br>SMR3B<br>PROL1<br>MUC7<br>AMTN<br>AMBN<br>ENAM<br>IGJ<br>UTP3<br>RUFY3<br>GRSF1<br>MOBKL1A<br>DCK |
| chr4:75931128-76957385 | BTC<br>DKFZP564O0823<br>RCHY1<br>THAP6<br>C4orf26<br>CDKL2<br>G3BP2<br>USO1                                                                                                         |
| chr4:89231344-90428182 | ABCG2<br>PPM1K<br>HERC6<br>HERC5<br>PIGY<br>HERC3<br>NAP1L5<br>FAM13A1<br>TIGD2                                                                                                     |



|                          |                                                         |
|--------------------------|---------------------------------------------------------|
|                          | GPRIN3                                                  |
| chr4:92505628-95897466   | GRID2<br>ATOH1<br>SMARCAD1<br>PGDS<br>PDLIM5<br>BMPR1B  |
| chr4:92969417-93647358   | GRID2                                                   |
| chr4:152041535-153449318 | LRBA<br>RPS3A<br>SH3D19<br>ESSPL<br>FAM160A1<br>PET112L |
| chr4:188474188-191164126 | ZFP42<br>TRIML2<br>TRIML1<br>FRG1<br>TUBB4Q             |
| chr5:9235717-9946560     | SEMA5A<br>TAS2R1                                        |
| chr5:10912186-11505944   | CTNND2                                                  |
| chr5:14525040-15234322   | TRIO<br>FAM105A<br>FAM105B<br>ANKH                      |
| chr5:45573056-46384240   | HCN1                                                    |
| chr5:75209785-76193792   | SV2C<br>IQGAP2<br>F2RL2<br>F2R<br>F2RL1<br>S100Z        |
| chr5:141874445-142427181 | FGF1<br>ARHGAP26                                        |

|                          |                                                            |
|--------------------------|------------------------------------------------------------|
| chr6:71032233-71665770   | COL9A1<br>FAM135A<br>C6orf57<br>SMAP1<br>B3GAT2            |
| chr6:77644608-78365965   | HTR1B                                                      |
| chr6:86816704-87733426   | HTR1E                                                      |
| chr6:91445589-94638804   | EPHA7                                                      |
| chr6:118705946-119293670 | SLC35F1<br>C6orf204<br>PLN<br>ASF1A<br>MCM9                |
| chr6:128863230-130509862 | PTPRK<br>LAMA2<br>ARHGAP18<br>C6orf191<br>L3MBTL3<br>SAMD3 |
| chr6:168985464-169590571 | THBS2<br>WDR27                                             |
| chr7:14326377-15604412   | DGKB<br>TMEM195                                            |
| chr7:62215205-63929057   | ZNF680<br>ZNF107<br>ZNF138                                 |
| chr7:69777660-71680977   | AUTS2<br>WBSCR17<br>CALN1                                  |
| chr7:105235446-105857403 | ATXN7L1<br>FLJ23834<br>SYPL1<br>NAMPT                      |

|                          |                                                                                                                                                          |
|--------------------------|----------------------------------------------------------------------------------------------------------------------------------------------------------|
| chr7:122788319-123545119 | IQUB<br>NDUFA5<br>ASB15<br>LMOD2<br>WASL<br>HYAL4<br>SPAM1                                                                                               |
| chr8:12977952-14075129   | DLC1<br>SGCZ                                                                                                                                             |
| chr8:14879967-16226257   | SGCZ<br>TUSC3<br>MSR1                                                                                                                                    |
| chr8:43177542-43910848   | HGSNAT<br>A26A1                                                                                                                                          |
| chr8:85438801-88322287   | RALYL<br>LRRCC1<br>E2F5<br>C8orf59<br>CA13<br>CA13<br>CA3<br>CA2<br>REXO1L1<br>PSKH2<br>ATP6V0D2<br>SLC7A13<br>WWP1<br>FAM82B<br>CPNE3<br>CNGB3<br>CNBD1 |
| chr8:89227035-90315131   | MMP16                                                                                                                                                    |
| chr8:107876892-108508538 | ANGPT1                                                                                                                                                   |
| chr8:125965894-126563499 | ZNF572<br>SQLE<br>KIAA0196<br>NSMCE2<br>TRIB1                                                                                                            |

|                           |                                                                                                                                                           |
|---------------------------|-----------------------------------------------------------------------------------------------------------------------------------------------------------|
| chr8:131230753-132355063  | DDEF1<br>ADCY8                                                                                                                                            |
| chr9:5647977-6819942      | KIAA1432<br>ERMP1<br>MLANA<br>KIAA2026<br>RANBP6<br>IL33<br>TPD52L3<br>UHRF2<br>GLDC<br>JMJD2C                                                            |
| chr9:86604848-87529107    | NTRK2<br>AGTPBP1                                                                                                                                          |
| chr10:92079458-92641459   | HTR7<br>RPP30                                                                                                                                             |
| chr10:132024456-134872862 | TCERG1L<br>PPP2R2D<br>BNIP3<br>JAKMIP3<br>DPYSL4<br>STK32C<br>LRRC27<br>PWWP2B<br>C10orf91<br>INPP5A<br>NKX6-2<br>C10orf92<br>C10orf93<br>GPR123<br>KNDC1 |
| chr11:5582423-7391991     | TRIM6<br>TRIM6-TRIM34<br>TRIM34<br>TRIM5<br>TRIM22<br>OR56B1<br>OR52N4<br>OR52N5<br>OR52N1<br>OR52N2<br>OR52E6<br>OR52E8<br>OR52E4                        |

OR56A3  
OR52L1  
OR56A4  
OR56A1  
OR56B4  
OR52B2  
OR52W1  
C11orf42  
FAM160A2  
CNGA4  
CCKBR  
PRKCDBP  
SMPD1  
APBB1  
HPX  
TRIM3  
ARFIP2  
FXC1  
C11orf47  
DNHD1  
KIAA0409  
ILK  
TAF10  
TPP1  
DCHS1  
MRPL17  
OR2AG2  
OR2AG1  
OR6A2  
OR10A5  
OR10A2  
OR10A4  
OR2D2  
OR2D3  
ZNF215  
ZNF214  
NLRP14  
RBMXL2  
SYT9

chr11:49964834-50669978 OR4C12

chr11:67841909-68957312 LRP5  
SAPS3  
GAL  
MTL5  
CPT1A  
MRPL21  
IGHMBP2  
MRGPRD  
MRGPRF  
TPCN2  
MYEOV

chr11:133553353-134382876 NCAPD3  
VPS26B  
THYN1  
ACAD8  
GLB1L3  
GLB1L2  
B3GAT1

chr12:7888157-10044293 SLC2A14  
SLC2A3  
FOXJ2  
C3AR1  
NECAP1  
CLEC4A  
ZNF705A  
FAM90A1  
CLEC6A  
CLEC4D  
CLEC4E  
AICDA  
MFAP5  
FAM80B  
A2ML1  
PHC1  
M6PR  
KLRG1  
A2ML1  
PZP  
KLRB1  
CLEC2D  
CLECL1  
CD69  
KLRF1  
CLEC2B  
CLEC12A  
CLEC1B

chr12:33415349-34496692 SYT10  
ALG10

chr12:33415349-34711193 SYT10  
ALG10

chr12:42798121-43455177 TMEM117  
NEL2

chr12:84576944-85337498 RASSF9  
NTS

MGAT4C

chr13:64959554-66299023 PCDH9

chr14:104032680-106358708 C14orf180  
TMEM179  
INF2  
C14orf151  
ADSSL1  
SIVA1  
AKT1  
KIAA0284  
PLD4  
AHNAK2  
C14orf79  
CDCA4  
GPR132  
JAG2  
NUDT14  
BRF1  
BTBD6  
PACS2  
MTA1  
CRIP2  
CRIP1  
C14orf80  
TMEM121

chr15:21016722-26002360 MKRN3  
MAGEL2  
NDN  
C15orf2  
SNRPN  
SNURF  
UBE3A  
ATP10A  
GABRB3  
GABRA5  
GABRG3  
OCA2

chr15:27000239-28103304 APBA2  
KIAA0574  
NDNL2  
TJP1

chr15:27013177-28153539 APBA2  
KIAA0574  
NDNL2  
TJP1

|                         |                                                                                                                                                                        |
|-------------------------|------------------------------------------------------------------------------------------------------------------------------------------------------------------------|
| chr15:29734334-30300525 | OTUD7A<br>CHRNA7                                                                                                                                                       |
| chr15:29734334-30302218 | OTUD7A<br>CHRNA7                                                                                                                                                       |
| chr15:29734334-30400921 | OTUD7A<br>CHRNA7                                                                                                                                                       |
| chr15:29807358-30319628 | CHRNA7                                                                                                                                                                 |
| chr15:30688712-32505886 | ARHGAP11A<br>SCG5<br>GREM1<br>FMN1<br>RYR3<br>AVEN<br>CHRM5<br>C15orf24<br>PGBD4<br>C15orf29<br>TMEM85<br>SLC12A6<br>NOLA3<br>C15orf55<br>LPCAT4<br>GOLGA8A            |
| chr15:30713368-32658588 | ARHGAP11A<br>SCG5<br>GREM1<br>FMN1<br>RYR3<br>AVEN<br>CHRM5<br>C15orf24<br>PGBD4<br>C15orf29<br>TMEM85<br>SLC12A6<br>NOLA3<br>C15orf55<br>LPCAT4<br>GOLGA8A<br>GOLGA8B |
| chr15:55108011-55905365 | TCF12                                                                                                                                                                  |



CGNL1  
Gcom1  
GRINL1A

chr16:15032942-16143932 PDXDC1  
NTAN1  
RRN3  
MPV17L  
C16orf45  
KIAA0430  
NDE1  
MYH11  
C16orf63  
ABCC1  
ABCC6

chr16:15156431-18072544 MPV17L  
C16orf45  
KIAA0430  
NDE1  
MYH11  
C16orf63  
ABCC1  
ABCC6  
NOMO3  
LOC339047  
XYLT1

chr16:15387380-16133472 MPV17L  
C16orf45  
KIAA0430  
NDE1  
MYH11  
C16orf63  
ABCC1

chr16:15387380-16143932 MPV17L  
C16orf45  
KIAA0430  
NDE1  
MYH11  
C16orf63  
ABCC1  
ABCC6

chr16:15398985-18072544 MPV17L  
C16orf45  
KIAA0430  
NDE1  
MYH11

C16orf63  
ABCC1  
ABCC6  
NOMO3  
LOC339047  
XYLT1

chr16:15408600-16143932  
MPV17L  
C16orf45  
KIAA0430  
NDE1  
MYH11  
C16orf63  
ABCC1  
ABCC6

chr16:21851681-22581356  
UQCRC2  
C16orf65  
VWA3A  
EEF2K  
POLR3E  
CDR2  
LOC23117

chr16:29342178-31155425  
BOLA2B  
BOLA2  
GIYD1  
GIYD2  
SULT1A4  
SULT1A3  
SPN  
QPRT  
C16orf54  
MAZ  
PRRT2  
C16orf53  
MVP  
CDIPT  
SEZ6L2  
ASPHD1  
KCTD13  
TMEM219  
TAOK2  
HIRIP3  
CCDC95  
DOC2A  
FLJ25404  
FAM57B  
ALDOA  
PPP4C  
TBX6  
YPEL3

GDPD3  
MAPK3  
CORO1A  
BOLA2B  
BOLA2  
GIYD1  
GIYD2  
SULT1A4  
SULT1A3  
CD2BP2  
TBC1D10B  
MYLPF  
ZNF553  
ZNF771  
XTP3TPA  
SEPHS2  
ITGAL  
ZNF768  
ZNF747  
ZNF764  
ZNF688  
ZNF785  
ZNF689  
PRR14  
FBRS  
SRCAP  
PHKG2  
LOC90835  
RNF40  
ZNF629  
BCL7C  
CTF1  
FBXL19  
ORAI3  
SETD1A  
HSD3B7  
STX1B  
STX4  
ZNF668  
ZNF646  
POL3S  
VKORC1  
BCKDK  
MYST1  
PRSS8  
PRSS36  
FUS  
PYCARD  
TRIM72  
PYDC1

chr16:29554843-30271572

SPN  
QPRT  
C16orf54

MAZ  
PRRT2  
C16orf53  
MVP  
CDIPT  
SEZ6L2  
ASPHD1  
KCTD13  
TMEM219  
TAOK2  
HIRIP3  
CCDC95  
DOC2A  
FLJ25404  
FAM57B  
ALDOA  
PPP4C  
TBX6  
YPEL3  
GDPD3  
MAPK3  
CORO1A  
BOLA2B  
BOLA2  
GIYD1  
GIYD2  
SULT1A4  
SULT1A3  
CD2BP2  
TBC1D10B

chr16:29563594-30367556

SPN  
QPRT  
C16orf54  
MAZ  
PRRT2  
C16orf53  
MVP  
CDIPT  
SEZ6L2  
ASPHD1  
KCTD13  
TMEM219  
TAOK2  
HIRIP3  
CCDC95  
DOC2A  
FLJ25404  
FAM57B  
ALDOA  
PPP4C  
TBX6  
YPEL3  
GDPD3

MAPK3  
CORO1A  
BOLA2B  
BOLA2  
GIYD1  
GIYD2  
SULT1A4  
SULT1A3  
CD2BP2  
TBC1D10B  
MYLPF  
ZNF553  
ZNF771  
XTP3TPA  
SEPHS2

chr16:80739605-82275564 MPHOSPH6  
CDH13

chr17:31964475-33182480 MYO19  
PIGW  
GGNBP2  
MGC4172  
MRM1  
LHX1  
AATF  
ACACA  
C17orf78  
TADA2L  
DUSP14  
AP1GBP1  
DDX52  
HNF1B

chr17:31979521-33205550 GGNBP2  
MGC4172  
MRM1  
LHX1  
AATF  
ACACA  
C17orf78  
TADA2L  
DUSP14  
AP1GBP1  
DDX52  
HNF1B

chr18:23102007-24621659 CDH2

chr19:7054542-7871339 INSR

ARHGEF18  
PEX11G  
C19orf45  
ZNF358  
MCOLN1  
PNPLA6  
KIAA1543  
XAB2  
PCP2  
STXBP2  
RETN  
C19orf59  
TRAPPC5  
FCER2  
CLEC4G  
CD209  
CLEC4M  
EVI5L  
LRRC8E  
MAP2K7

chr19:15436801-16084287  
FLJ21438  
PGLYRP2  
CYP4F22  
CYP4F8  
CYP4F3  
CYP4F12  
OR10H2  
OR10H3  
OR10H5  
OR10H1  
CYP4F2  
CYP4F11  
OR10H4  
TPM4  
RAB8A

chr19:21575835-22346694  
ZNF100  
ZNF43  
ZNF208  
ZNF257  
ZNF676  
LOC342994

chr20:3036010-3839896  
UBOX5  
FASTKD5  
ProSAPiP1  
C20orf116  
ITPA  
SLC4A11  
C20orf194  
ATRN

|                         |                                                                                                            |
|-------------------------|------------------------------------------------------------------------------------------------------------|
|                         | GFRA4<br>ADAM33<br>SIGLEC1<br>HSPA12B<br>C20orf27<br>SPEF1<br>CENPB<br>CDC25B<br>C20orf29<br>VISA<br>PANK2 |
| chr20:12795614-14137779 | SPTLC3<br>C20orf82<br>TASP1<br>ESF1<br>C20orf7<br>SEL1L2<br>MACROD2                                        |
| chr20:14574845-15159056 | MACROD2                                                                                                    |
| chr21:31669392-32494130 | TIAM1<br>SOD1<br>SFRS15<br>HUNK                                                                            |
| chr21:39655437-40231693 | WRB<br>LCA5L<br>SH3BGR<br>B3GALT5<br>IGSF5<br>PCP4                                                         |
| chr22:15634399-16265697 | XKR3<br>GAB4<br>IL17RA<br>CECR6<br>CECR5<br>CECR1                                                          |
| chr22:17257787-18686993 | DGCR6<br>PRODH<br>DGCR2<br>DGCR14<br>TSSK2<br>GSC2<br>SLC25A1<br>CLTCL1                                    |

HIRA  
MRPL40  
C22orf39  
UFD1L  
CDC45L  
CLDN5  
GP1BB  
TBX1  
GNB1L  
C22orf29  
TXNRD2  
COMT  
ARVCF  
C22orf25  
DGCR8  
HTF9C  
RANBP1  
ZDHHC8  
RTN4R  
DGCR6L

chr22:22020325-23326630  
IGLL1  
LOC51233  
RGL4  
ZNF70  
VPREB3  
C22orf15  
CHCHD10  
MMP11  
SMARCB1  
DERL3  
SLC2A11  
MIF  
GSTT2B  
GSTT2  
DDTL  
DDTL  
GSTT2  
GSTT1  
CABIN1  
SUSD2  
GGT5  
SPECC1L  
ADORA2A  
UPB1  
C22orf13  
SNRPD3  
GGT1  
C22orf36

chr22:44041512-44638874  
UPK3A  
FAM118A  
SMC1B



RIBC2  
FBLN1  
ATXN10

### Supplementary Table 3

Global burden of rare CNVs larger than 200kb. RATE; the average number of CNVs per person. CNV(n); the number of CNVs observed. P values are empirical and one-sided.\* IQ data were unavailable for 14 ADHD cases

|                                                                   |        | Burden of all CNVs |          |                    |         | Burden of Deletions Only |          |                    |        | Burden of Duplications Only |          |                    |         |
|-------------------------------------------------------------------|--------|--------------------|----------|--------------------|---------|--------------------------|----------|--------------------|--------|-----------------------------|----------|--------------------|---------|
|                                                                   |        | ADHD               | Controls | Case/Control ratio | P       | ADHD                     | Controls | Case/Control ratio | P      | ADHD                        | Controls | Case/Control ratio | P       |
| <b>ADHD/Controls</b><br>(n=366/1047)<br>Size > 200kb              | CNV(n) | 131                | 387      |                    |         | 37                       | 145      |                    |        | 94                          | 242      |                    |         |
|                                                                   | RATE   | 0.36               | 0.37     | 0.97               | 0.62    | 0.10                     | 0.14     | 0.73               | 0.94   | 0.26                        | 0.23     | 1.11               | 0.23    |
|                                                                   | AVGKB  | 710.8              | 456.3    |                    | 0.00011 | 630.7                    | 393.6    |                    | 0.0053 | 770.5                       | 499.7    |                    | 0.0049  |
| <b>ADHD with IQ≥70/Controls</b><br>(n=319/1047)<br>Size > 200kb   | CNV(n) | 108                | 387      |                    |         | 27                       | 145      |                    |        | 81                          | 242      |                    |         |
|                                                                   | RATE   | 0.34               | 0.37     | 0.92               | 0.78    | 0.08                     | 0.14     | 0.61               | 0.99   | 0.25                        | 0.23     | 1.10               | 0.27    |
|                                                                   | AVGKB  | 698.8              | 456.3    |                    | 0.00011 | 603.7                    | 393.6    |                    | 0.018  | 747.8                       | 499.7    |                    | 0.00110 |
| <b>ADHD with IQ&lt;70/Controls</b><br>(n=33/1047)<br>Size > 200kb | N      | 18                 | 387      |                    |         | 7                        | 145      |                    |        | 11                          | 242      |                    |         |
|                                                                   | RATE   | 0.55               | 0.37     | 1.48               | 0.10    | 0.21                     | 0.14     | 1.53               | 0.20   | 0.33                        | 0.23     | 1.44               | 0.18    |
|                                                                   | AVGKB  | 750.3              | 456.3    |                    | 0.0378  | 669.1                    | 393.6    |                    | 0.10   | 856.7                       | 499.7    |                    | 0.04    |
